# Supplementary material
Source: publisher site journal article supplement (https://www.dovepress.com/article/283020)
Supplement: Supplementary file 1 [file get_supplementary_file.php]

## Supplementary materials

Supplementary table S1: Inclusion number for each center per year

| Center                                     | Number of patients included per year |      |      |      |      | total No. for each center |
|--------------------------------------------|--------------------------------------|------|------|------|------|---------------------------|
|                                            | 2015                                 | 2016 | 2017 | 2018 | 2019 |                           |
| Beijing Chao-Yang Hospital                 | 30                                   | 49   | 53   | 48   | 34   | 214                       |
| Beijing Chao-Yang Hospital, West<br>Branch | 6                                    | 11   | 10   | 9    | 8    | 44                        |
| Beijing Huai-Rou Hospital                  | 8                                    | 13   | 11   | 17   | 13   | 62                        |
| Total No for each year                     | 44                                   | 73   | 74   | 74   | 55   | 320                       |

Supplementary table S2. Patient baseline characteristics according to HFNC failure and success

| Characteristic                           | HFNC success     | HFNC failure    | <i>P</i> |
|------------------------------------------|------------------|-----------------|----------|
|                                          | group<br>(n=144) | group<br>(n=16) |          |
| Age (years)                              | 66.5±6.28        | 70.9±8.76       | 0.102    |
| Male no. (%)                             | 93(64.6)         | 8(50.0)         | 0.282    |
| Body mass index (kg/m <sup>2</sup> )     | 23.1±4.61        | 22.8±3.37       | 0.868    |
| COPD history(years)                      | 16.5±13.5        | 19.6±12.5       | 0.429    |
| Smoking history (years)                  | 22.6±12.8        | 19.4±8.08       | 0.463    |
| Current smokers no. (%)                  | 93(64.6)         | 9(56.2)         | 0.587    |
| CAT scores                               | 20.2±5.55        | 21.7±5.38       | 0.593    |
| APACHEII scores                          | 15.8±6.50        | 16.0±6.37       | 0.918    |
| Comorbidity, no. (%)                     |                  |                 |          |
| Hypertension                             | 31(21.5)         | 4(25.0)         | 0.753    |
| Diabetes mellitus                        | 14(9.7)          | 3(18.8)         | 0.382    |
| Coronary heart disease                   | 16(11.1)         | 4(25.0)         | 0.119    |
| Cerebrovascular Disease                  | 7(4.9)           | 2(12.5)         | 0.223    |
| Obsolete Pulmonary Tuberculosis          | 6(4.2)           | 1(6.2)          | 0.529    |
| Baseline spirometry                      |                  |                 |          |
| Pre-bronchodilator FEV1 (L)              | 1.49±0.57        | 1.57±0.61       | 0.635    |
| Post-bronchodilator FEV1 (L)             | 1.70±0.59        | 1.75±0.56       | 0.790    |
| Post-bronchodilator FEV1, %<br>predicted | 59.7±17.9        | 68.2±18.7       | 0.076    |
| Post-bronchodilator FEV1/FVC<br>ratio, % | 52.1±10.4        | 55.7±10.4       | 0.212    |
| Vital signs                              |                  |                 |          |
| Body temperature (°C)                    | 36.3±2.62        | 36.6±0.35       | 0.559    |
| Heart rate (beats/min)                   | 90.4±13.6        | 94.1±14.4       | 0.323    |
| Mean arterial pressure (mmHg)            | 93.2±13.1        | 86.5±10.2       | 0.276    |

|                                        |            |           |        |
|----------------------------------------|------------|-----------|--------|
| Respiratory rate (beats/min)           | 20.1±1.52  | 22.4±2.47 | 0.032  |
| Respiratory rate (beats/min) 24h       | 21.3±2.31  | 22.7±2.65 | 0.059  |
| Respiratory rate (beats/min) 48h       | 22.4±5.89  | 22.0±2.83 | 0.829  |
| Arterial blood gas (room air)          |            |           |        |
| pH                                     | 7.38±0.05  | 7.40±0.04 | 0.281  |
| PaO <sub>2</sub> (mmHg)                | 55.9±5.97  | 55.8±9.38 | 0.964  |
| PaCO <sub>2</sub> (mmHg)               | 54.6±6.88  | 58.0±8.94 | 0.086  |
| SaO <sub>2</sub> (%)                   | 89.1±4.67  | 90.5±4.82 | 0.295  |
| Arterial blood gas (24h)               |            |           |        |
| pH                                     | 7.40±0.04  | 7.38±0.04 | 0.334  |
| PaO <sub>2</sub> (mmHg)                | 72.1±8.69  | 71.2±11.7 | 0.786  |
| PaCO <sub>2</sub> (mmHg)               | 52.4±7.96  | 59.0±11.8 | 0.006  |
| SaO <sub>2</sub> (%)                   | 93.3±2.72  | 92.9±1.88 | 0.592  |
| Arterial blood gas (48h)               |            |           |        |
| pH                                     | 7.40±0.04  | 7.39±0.02 | 0.756  |
| PaO <sub>2</sub> (mmHg)                | 70.6±14.0  | 68.1±10.3 | 0.649  |
| PaCO <sub>2</sub> (mmHg)               | 51.5±5.61  | 55.8±5.61 | 0.012  |
| SaO <sub>2</sub> (%)                   | 93.3±2.18  | 92.3±2.50 | 0.237  |
| Laboratory parameters                  |            |           |        |
| White blood cell (×10 <sup>9</sup> /L) | 7.67±4.57  | 8.35±4.59 | 0.582  |
| Neutrophil (%)                         | 66.6±19.1  | 68.7±21.7 | 0.677  |
| Albumin (g/L)                          | 37.1±5.17  | 35.8±3.54 | 0.363  |
| Creatinine (umol/L)                    | 64.9±25.2  | 56.6±19.5 | 0.217  |
| NT-proBNP (pg/ml)                      | 83(32-357) | 63(5-387) | 0.150* |

Abbreviations: APACHE, Acute Physiology and Chronic Health Evaluation; BE, base excess; COPD, Chronic Obstructive Pulmonary Disease; CAT score, COPD Assessment Test (CAT) scores; FEV<sub>1</sub>, forced expiratory volume in one Second; FVC, forced vital capacity; FiO<sub>2</sub>, fraction of inspired oxygen; HFNC, high-flow nasal cannula oxygen therapy; NT-proBNP, N-Terminal pro-brain natriuretic peptide; PaO<sub>2</sub>, partial pressure of oxygen; PaCO<sub>2</sub>, partial

pressure of carbon dioxide.

\*: Continuous variables were compared using the Mann-Whitney U test.

Supplementary table S3: HFNC parameter setting

| Characteristic       | Baseline | 12h       | 24h       | 48h       | 72h       | 120h      |
|----------------------|----------|-----------|-----------|-----------|-----------|-----------|
| FiO <sub>2</sub>     | 0.21     | 0.26±0.05 | 0.25±0.05 | 0.26±0.04 | 0.25±0.05 | 0.25±0.05 |
| Flow (L/min)         | -        | 27.1±9.43 | 36.2±10.0 | 38.4±11.4 | 38.1±11.7 | 38.1±12.1 |
| Temperature (°C)     | -        | 32.1±1.54 | 32.9±1.5  | 32.6±1.79 | 32.9±1.51 | 32.8±1.47 |
| SpO <sub>2</sub> (%) | -        | 92.5±2.54 | 93.0±3.69 | 93.2±2.21 | 93.0±3.39 | 93.8±2.73 |

Abbreviations: FiO<sub>2</sub>, fraction of inspired oxygen; HFNC, high-flow nasal cannula oxygen therapy;
